# Supplementary material for: Consistency evaluation of tropospheric ozone from ozonesonde and IAGOS (In-service Aircraft for a Global Observing System) observations: vertical distribution, ozonesonde types, and station–airport distance
Source: Copernicus journal article supplement (doi:10.5194/acp-24-11927-2024), 2024-10-25
Supplement: Supplementary file 1 [file acp-24-11927-2024-supplement.pdf]

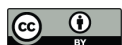

*Supplement of*

**Consistency evaluation of tropospheric ozone from ozonesonde and IAGOS (In-service Aircraft for a Global Observing System) observations: vertical distribution, ozonesonde types, and station–airport distance**

**Honglei Wang et al.**

*Correspondence to:* David W. Tarasick ([david.tarasick@ec.gc.ca](mailto:david.tarasick@ec.gc.ca)) and Jane Liu ([janejj.liu@utoronto.ca](mailto:janejj.liu@utoronto.ca))

The copyright of individual parts of the supplement might differ from the article licence.

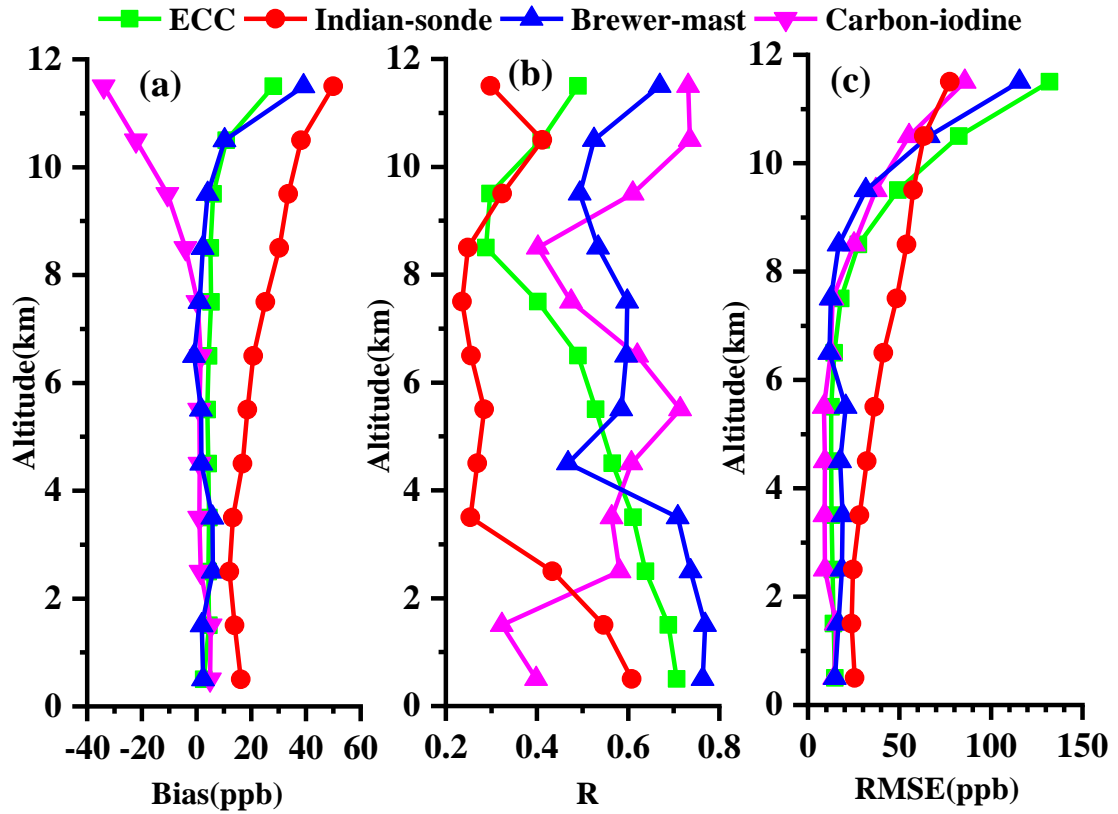

18

19 **Figure S1.** Bias, correlation coefficient (R), and RMSE for four types of ozonesonde and aircraft

20 observations in different altitudes.

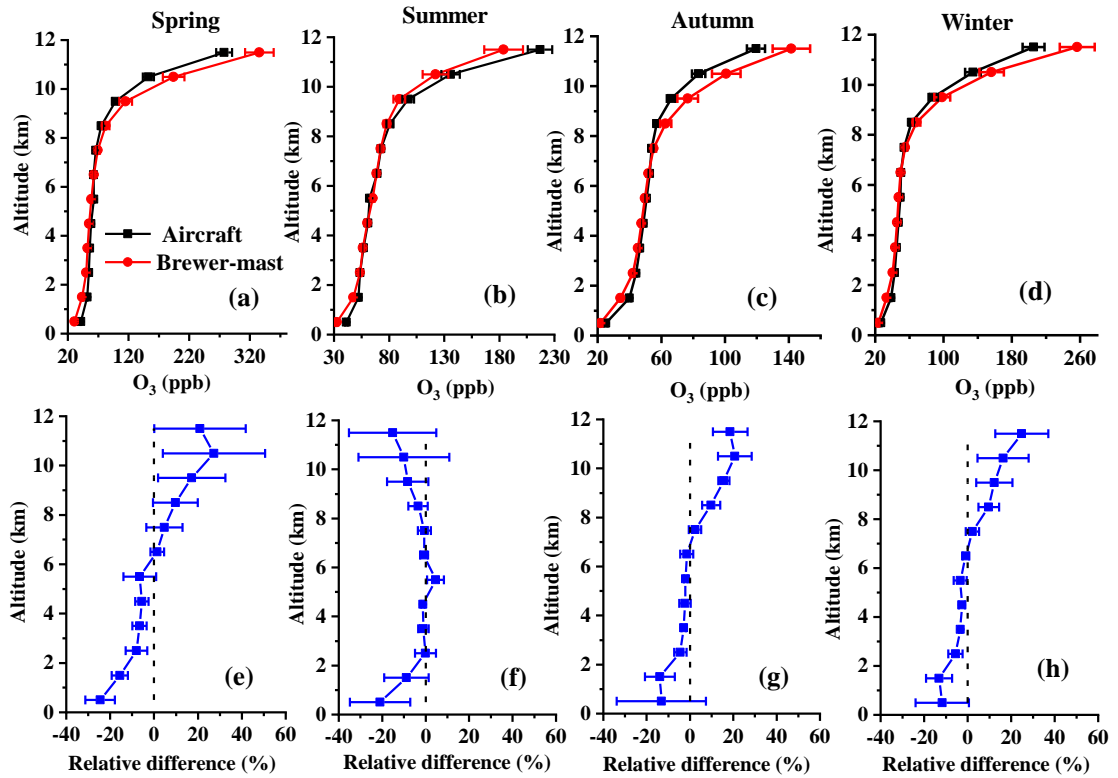

21

22 **Figure S2.** Comparison of vertical profiles of tropospheric O<sub>3</sub> (a-d) and the mean relative difference

23 (e-h) between Brewer-mast ozonesonde and aircraft observations in four seasons. The black dashed

24 line is the zero line in (e-h). Note that the horizontal scales of the plots among (a)-(d) and among (e)  
 25 -(h) are not the same.

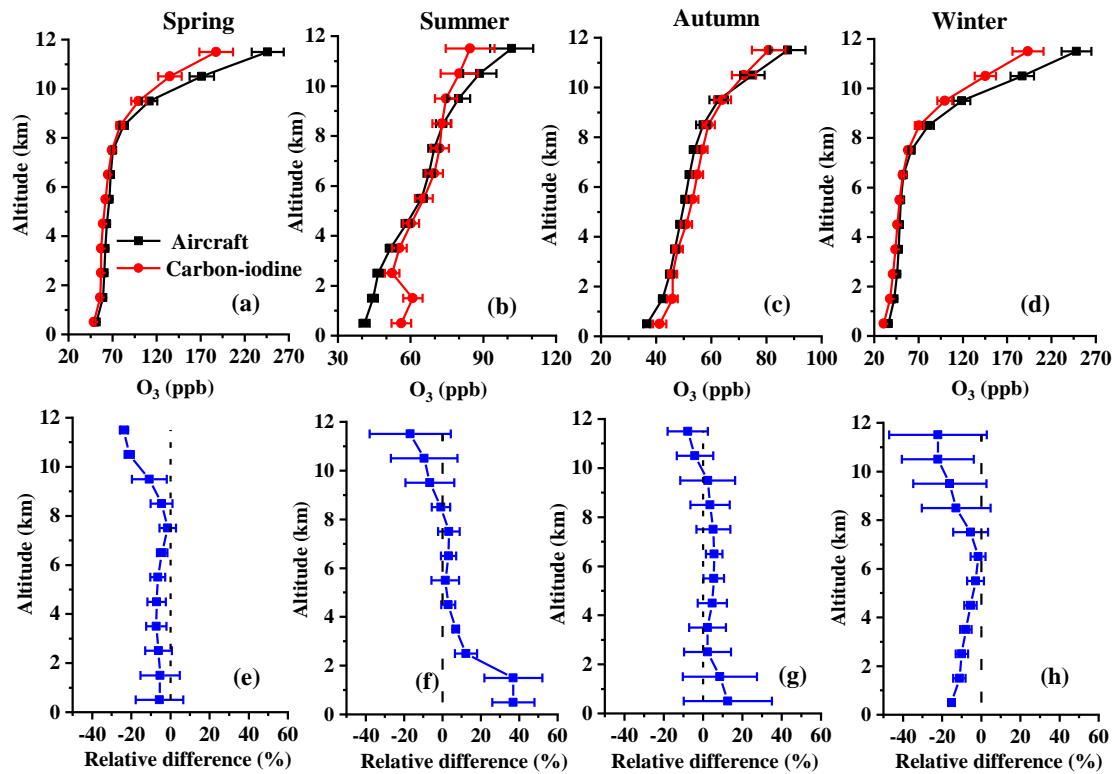

26  
 27 **Figure S3.** The same as Figure S1, but between Carbon-iodine ozonesonde and aircraft observations.

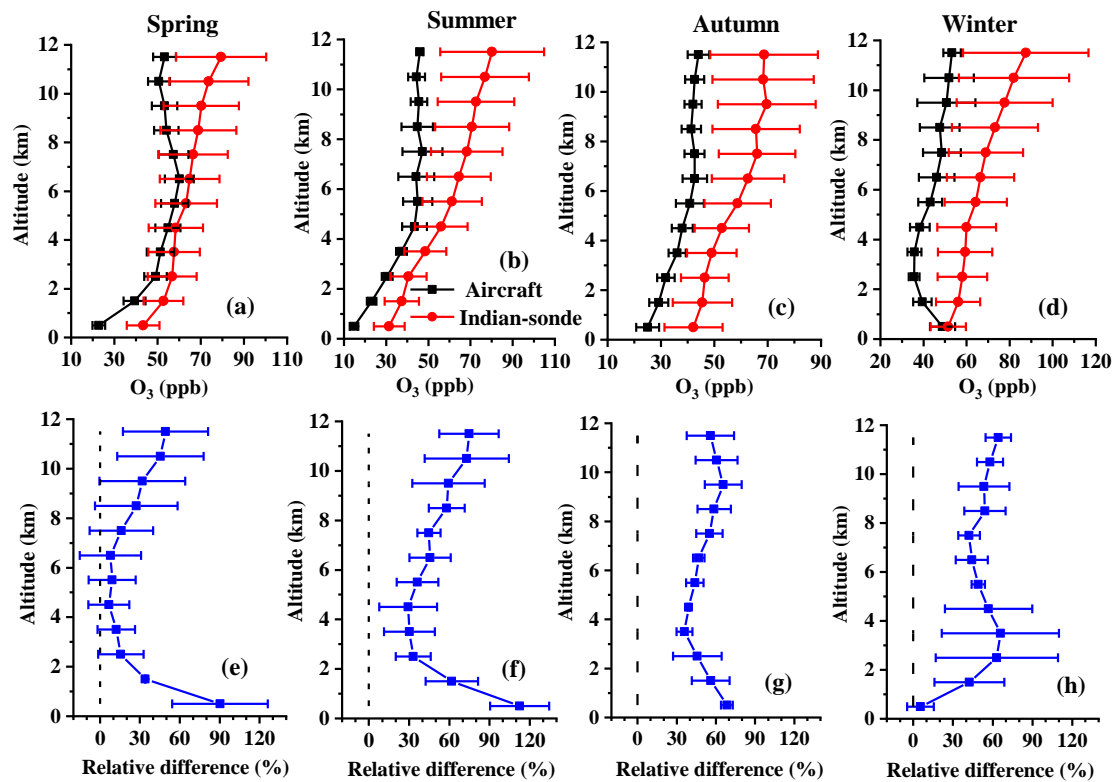

28  
 29 **Figure S4.** The same as Figure S1, but between Indian-sonde and aircraft observations.

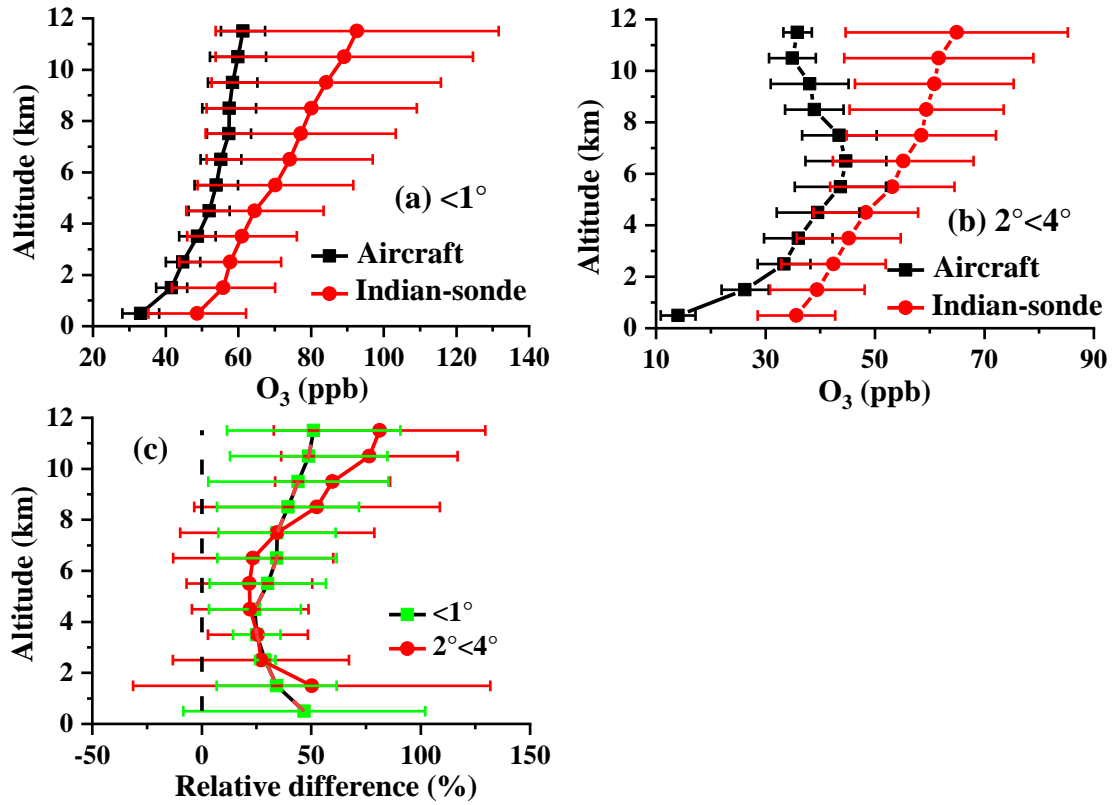

30

31 **Figure S5.** Vertical profiles of tropospheric O<sub>3</sub> (a and b) and the mean relative difference between  
 32 Indian-sonde and aircraft observations at different station-pair distances (c) and the black dashed  
 33 line is the zero line in (c).

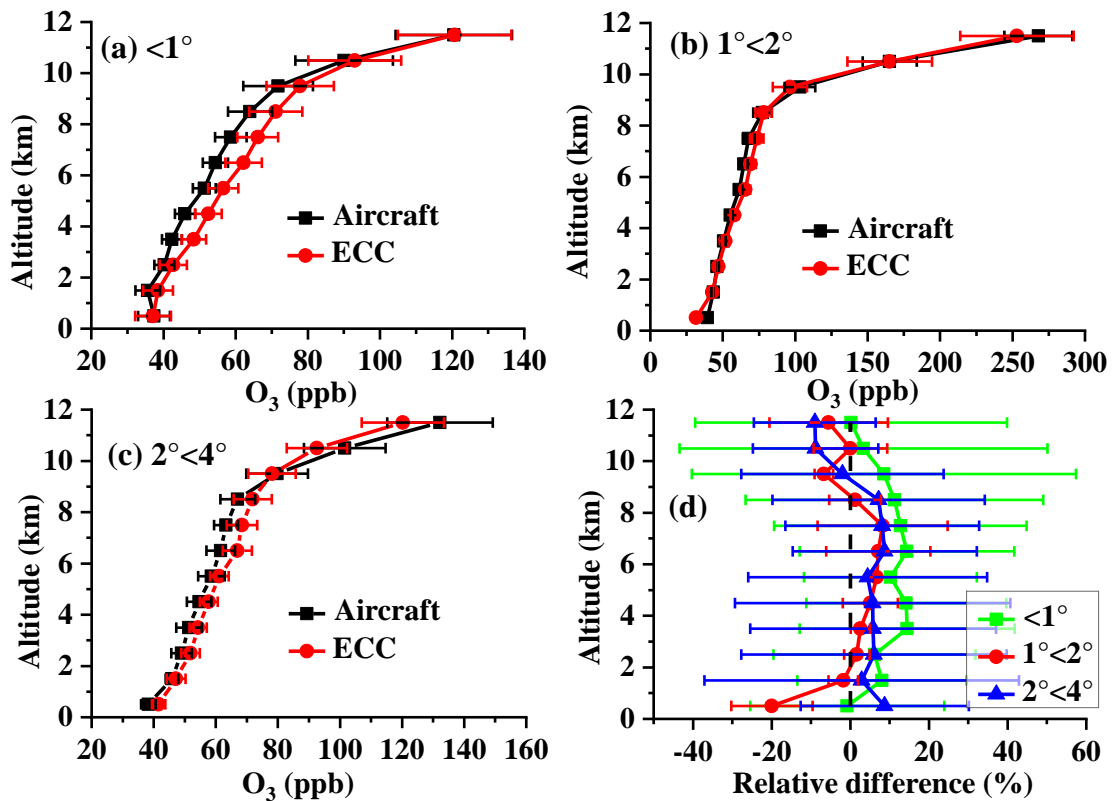

34

35 **Figure S6.** Vertical profiles of tropospheric O<sub>3</sub> (a-c) and the mean relative difference between ECC  
36 ozonesonde and aircraft observations at different station-pair distances in summer (d) and the black  
37 dashed line is the zero line in (d).

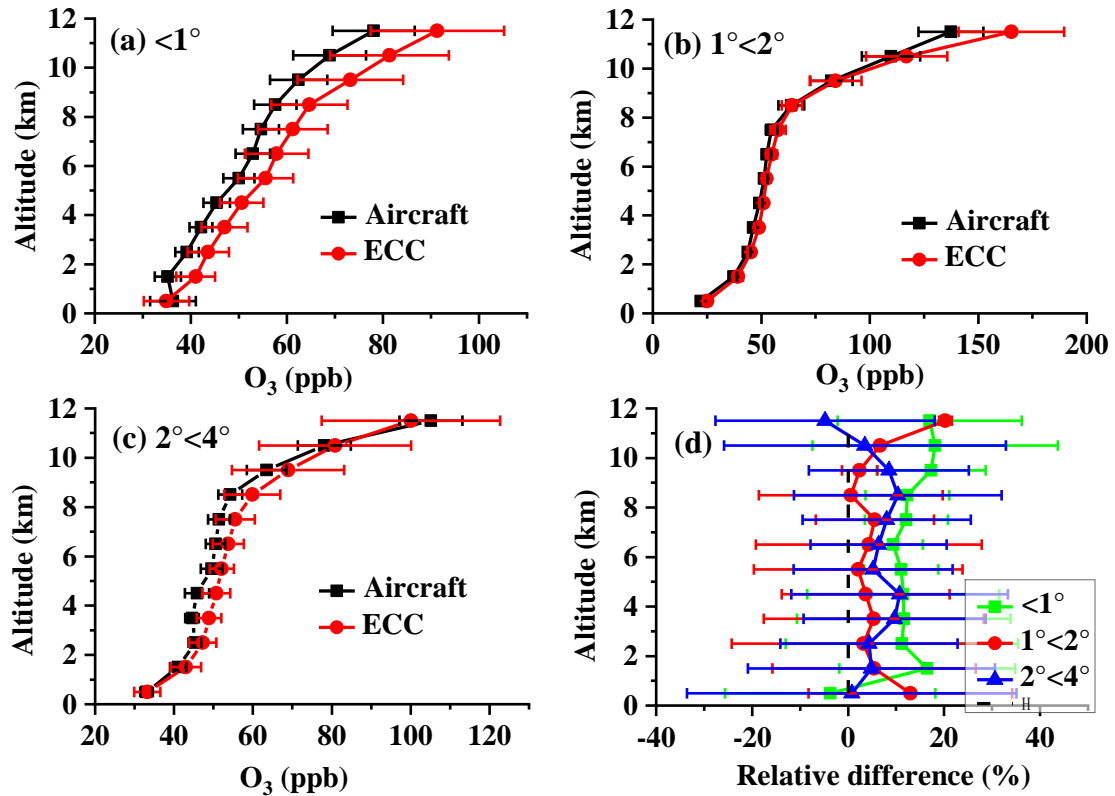

38  
39 **Figure S7.** Vertical profiles of tropospheric O<sub>3</sub> (a-c) and the mean relative difference between ECC  
40 ozonesonde and aircraft observations at different station-pair distances in autumn (d) and the black  
41 dashed line is the zero line in (d).

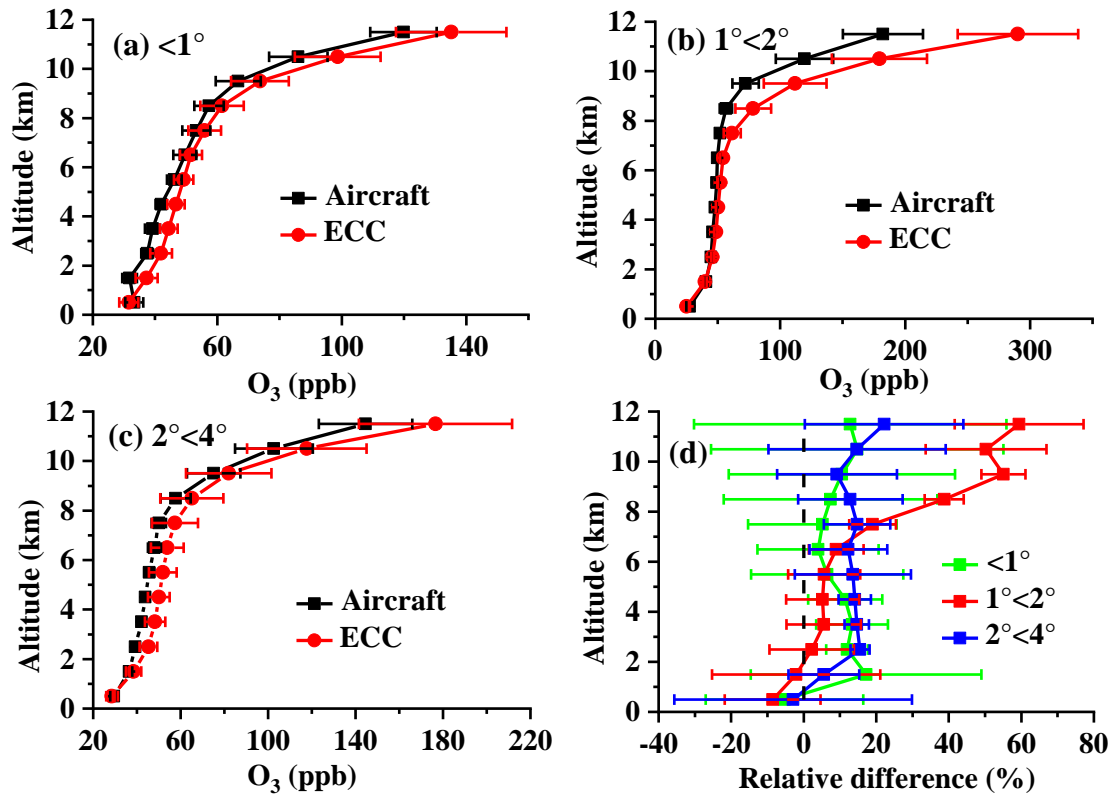

42

43 **Figure S8.** Vertical profiles of tropospheric O<sub>3</sub> (a-c) and mean relative difference between ECC

44 ozonesonde and aircraft observations at different station-pair distances in winter (d) and the black

45 dashed line is the zero line in (d).

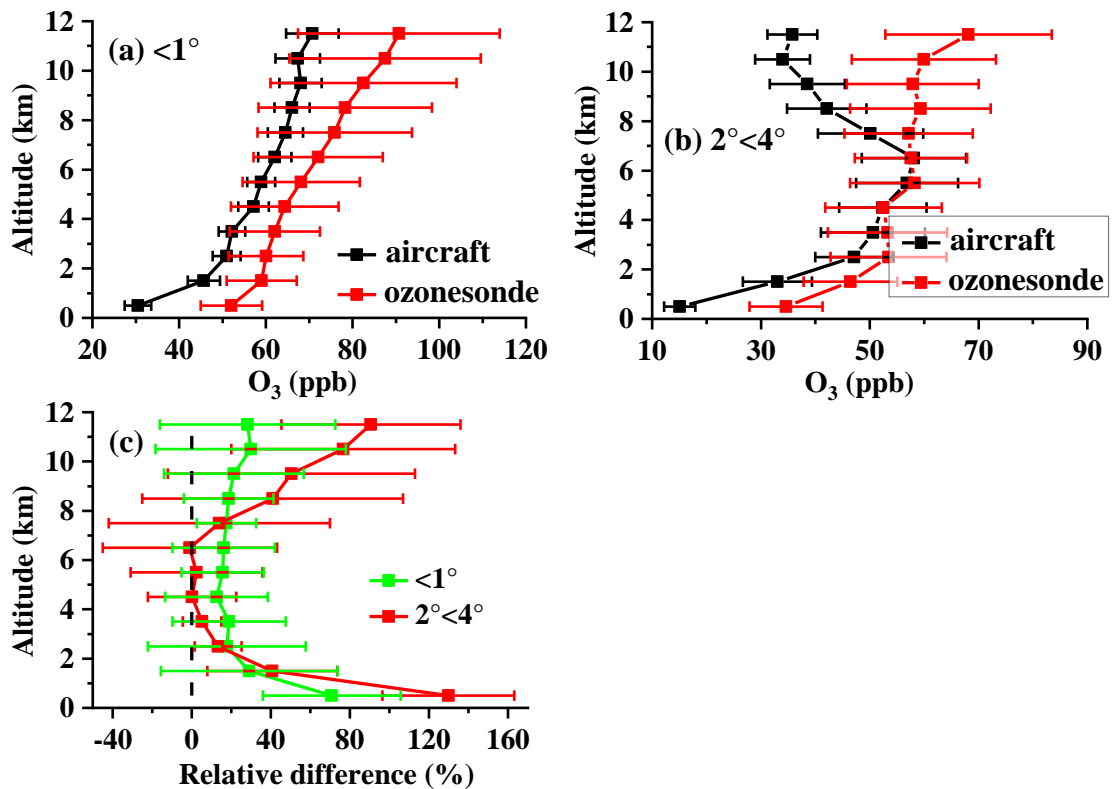

46

47 **Figure S9.** Vertical profiles of tropospheric O<sub>3</sub> (a and b) and mean relative difference between  
48 Indian-sonde ozonesonde and aircraft observations at different station-pair distances in spring (c)  
49 and the black dashed line is the zero line in (c).
